# Supplementary material
Source: PubMed Central journal article supplement (PMC4801216)
Supplement: NIHMS760101-supplement-Supplemental_figure_1.pdf [file NIHMS760101-supplement-Supplemental_figure_1.pdf]

# SPION-Enhanced Magnetic Resonance Imaging of Alzheimer's Disease Plaques in A $\beta$ PP/PS-1 Transgenic Mouse Brain

Laurel O. Sillerud<sup>a,\*</sup>, Nathan O. Solberg<sup>a</sup>, Ryan Chamberlain<sup>d</sup>, Robert A. Orlando<sup>a</sup>, John E. Heidrich<sup>c</sup>, David C. Brown<sup>b</sup>, Christina I. Brady<sup>a</sup>, Thomas A. Vander Jagt<sup>a,c</sup>, Michael Garwood<sup>d</sup> and David L. Vander Jagt<sup>a,c</sup>

<sup>a</sup>Department of Biochemistry and Molecular Biology, University of New Mexico School of Medicine, Albuquerque, NM, USA

<sup>b</sup>Department of Pathology, University of New Mexico School of Medicine, Albuquerque, NM, USA

<sup>c</sup>Quatros LLC, Albuquerque, NM, USA

<sup>d</sup>The Center for Magnetic Resonance Research and Department of Radiology, University of Minnesota Medical School, Minneapolis, MN, USA

Accepted 31 October 2012

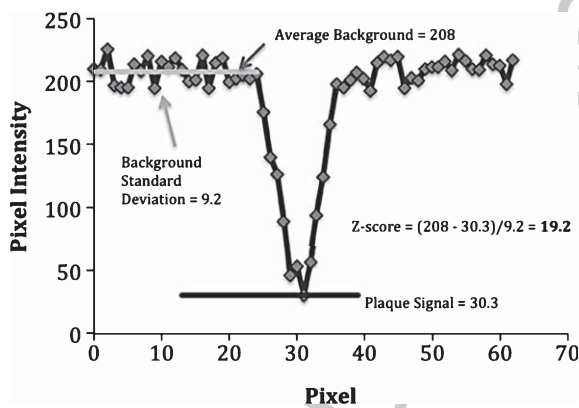

Supplemental Figure 1. Scheme for measurement of the Z-score for a plaque in magnetic resonance images showing how the average background, the background standard deviation and the plaque signal were determined. The Z-score for this plaque was 19.2.

\*Correspondence to: Laurel O. Sillerud, Departments of Biochemistry and Molecular Biology, University of New Mexico School of Medicine, Albuquerque, NM 87131, USA. E-mail: laurel@unm.edu.
